# Supplementary material
Source: publisher site journal article supplement (https://www.spandidos-publications.com/4930/downloadSupplementary)

Figure S1. RLE results for 50 samples and full WGCNA results. (A) RLE results. The median of each sample is 2.3, which reflects the consistency of the expression quantification of all samples in the merged matrix. (B) Full WGCNA results. RLE, relative logarithmic expression; WGCNA, Weighted Gene Co-expression Network Analysis.

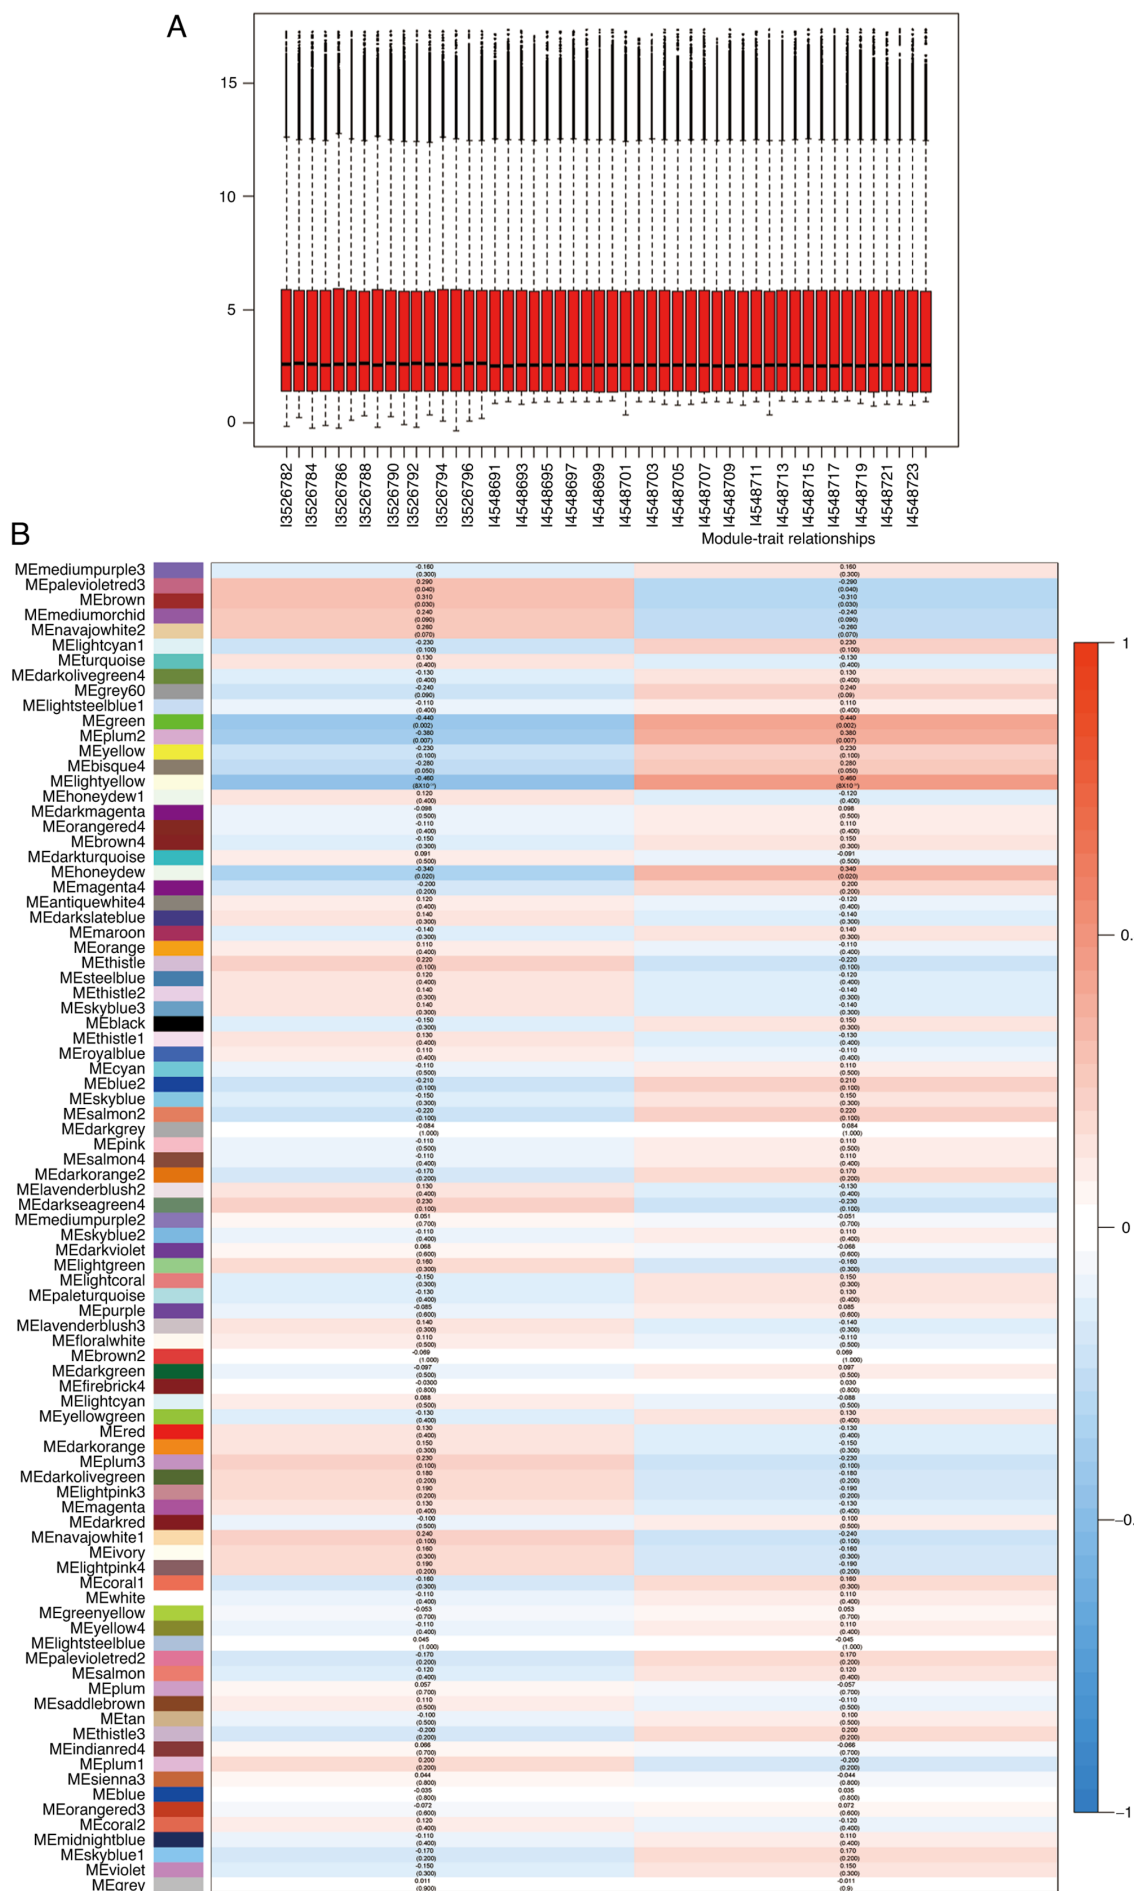

Supplement: Supplementary file 1 [file downloadSupplementary]
